# Supplementary material
Source: ML conference proceedings conference paper supplement (https://proceedings.mlr.press/v38/gunasekar15.html)
Supplement: Supplementary file 1 [file gunasekar15-supp.pdf]

# Consistent Collective Matrix Completion under Joint Low Rank Structure: Supplementary Material

Suriya Gunasekar  
suriya@utexas.edu

Makoto Yamada  
makotoy@yahoo-inc.com

Dawei Yin  
daweiy@yahoo-inc.com

Yi Chang  
yichang@yahoo-inc.com

## A Operator Bernstein Inequality

**Theorem 1** (Operator Bernstein Inequality [4]). *Let  $S_i, i = 1, 2, \dots, m$  be i.i.d self-adjoint operators of dimension  $N$ . If there exists constants  $R$  and  $\sigma^2$ , such that  $\forall i \|S_i\|_{op} \leq R$  a.s., and  $\sum_i \|E[S_i^2]\|_{op} \leq \sigma^2$ ,*

$$\text{then } \forall t > 0 \quad Pr(\|\sum_i S_i\|_{op} > t) \leq N \exp\left(\frac{-t^2/2}{\sigma^2 + \frac{Rt}{3}}\right) \quad (25)$$

## B Proof of Lemma 1

Recall that:

- $T(\mathcal{X}) = \text{aff}\{\mathcal{Y} \in \bar{\mathfrak{X}} : \forall v, \text{rowSpan}(\mathbb{Y}_{r_v}) \subseteq \text{rowSpan}(\mathbb{X}_{r_v}) \text{ or } \text{rowSpan}(\mathbb{Y}_{c_v}) \subseteq \text{rowSpan}(\mathbb{X}_{c_v})\}$
- $T^\perp(\mathcal{X}) = \{\mathcal{Y} \in \bar{\mathfrak{X}} : \forall v, \text{rowSpan}(Y_v) \perp \text{rowSpan}(M_v) \text{ and } \text{colSpan}(Y_v) \perp \text{colSpan}(M_v)\}$

We need to show that  $\forall \mathcal{X} \in \bar{\mathfrak{X}}, \mathcal{X} \in T^\perp$  iff  $\langle \mathcal{X}, \mathcal{Y} \rangle = 0, \forall \mathcal{Y} \in T$ .

$\implies$  Let  $\mathcal{X} \in \{\mathcal{X} \in \bar{\mathfrak{X}} : \langle \mathcal{X}, \mathcal{Y} \rangle = 0, \forall \mathcal{Y} \in T\}$ , if  $\mathcal{X} \notin T^\perp$ , then  $\exists v$  such that atleast one of the statements below hold true:

- (a)  $\text{rowSpan}(X_v) \not\subseteq \text{rowSpan}(M_v)$ , or
- (b)  $\text{colSpan}(X_v) \not\subseteq \text{colSpan}(M_v)$

WLOG let us assume that (a) is true, the proof for the other case is analogous. Consider the decomposition  $X_v = X_v^{(1)} + X_v^{(2)}$  such that  $\text{rowSpan}(X_v^{(1)}) \perp \text{rowSpan}(M_v)$  and  $\text{rowSpan}(X_v^{(2)}) \subseteq \text{rowSpan}(M_v)$ . Consider the collective matrix  $\mathcal{Y}$  such that  $Y_{v'} = X_v^{(2)}$  if  $v' = v$ , and  $Y_{v'} = 0$  otherwise. Clearly,  $\mathcal{Y} \in T$  as  $\forall v, \text{rowSpan}(\mathbb{Y}_{r_v}) \subseteq \text{rowSpan}(\mathbb{X}_{r_v})$ , but  $\langle \mathcal{X}, \mathcal{Y} \rangle \neq 0$ , a contradiction.

$\impliedby$  If  $\mathcal{X} \in T^\perp$ , then by the definitions,  $\forall \mathcal{Y} \in T, \langle \mathcal{X}, \mathcal{Y} \rangle = \sum_v \langle X_v, Y_v \rangle = 0$ .

## C Proof of Lemma 3

Recall  $\mathcal{R}_s$  and  $\mathcal{R}_\Omega$  from (18) and (19). Also recall that  $\forall \mathcal{X} \in \bar{\mathfrak{X}}, \mathcal{X} = \sum_{v=1}^V \sum_{(i,j) \in \mathcal{I}(v)} \langle \mathcal{X}, \mathcal{E}^{(v,i,j)} \rangle \mathcal{E}^{(v,i,j)}$ .

Thus,  $P_T(\mathcal{X}) = \sum_{v=1}^V \sum_{(i,j) \in \mathcal{I}(v)} \langle P_T(\mathcal{X}), \mathcal{E}^{(v,i,j)} \rangle \mathcal{E}^{(v,i,j)} = \sum_{v=1}^V \sum_{(i,j) \in \mathcal{I}(v)} \langle \mathcal{X}, P_T(\mathcal{E}^{(v,i,j)}) \rangle \mathcal{E}^{(v,i,j)}$

Define  $\mathcal{V}_s := P_T \mathcal{R}_s P_T : \mathcal{X} \rightarrow \frac{1}{p(v_s, i_s, j_s)} \langle \mathcal{X}, P_T(\mathcal{E}^{(s)}) \rangle P_T(\mathcal{E}^{(s)})$ , where  $p(v, i, j) = \frac{|\Omega_{r_v}|}{2n_{r_v} m_{r_v}} + \frac{|\Omega_{c_v}|}{2n_{c_v} m_{c_v}}$ .

We then have  $E[\mathcal{V}_s] = \frac{1}{|\Omega|}P_T$ , and

$$\begin{aligned} \|\mathcal{V}_s\|_{\text{op}} &= \sup_{\|\mathcal{X}\|_F=1} \frac{1}{p(v_s, i_s, j_s)} \langle \mathcal{X}, P_T(\mathcal{E}^{(s)}) \rangle \|P_T(\mathcal{E}^{(s)})\|_F = \frac{1}{p(v_s, i_s, j_s)} \|P_T(\mathcal{E}^{(s)})\|_F^2 \\ &\stackrel{(a)}{\leq} \frac{1}{p(v_s, i_s, j_s)} \left( \frac{\mu_0 R}{m_{rv_s}} + \frac{\mu_0 R}{m_{cv_s}} \right) \stackrel{(b)}{\leq} \frac{1}{c_0 \beta \log N}, \end{aligned} \quad (26)$$

where (a) follows from the incoherence condition in Assumption 2, and (b) follows as  $\forall k, |\Omega_k| > c_0 \mu_0 n_k R \beta \log N$ .

(i) Bound on  $\|\mathcal{V}_s - E[\mathcal{V}_s]\|_{\text{op}}$

$$\|\mathcal{V}_s - E[\mathcal{V}_s]\|_{\text{op}} \stackrel{(a)}{\leq} \max(\|\mathcal{V}_s\|_{\text{op}}, \|E[\mathcal{V}_s]\|_{\text{op}}) \leq \max\left(\frac{1}{c_0 \beta \log N}, \frac{1}{\Omega}\right) = \frac{1}{c_0 \beta \log N} \quad (27)$$

where (a) follows as both  $\mathcal{V}_s$  and  $E[\mathcal{V}_s]$  are positive semidefinite.

(ii) Bound on  $\sum_{s=1}^{|\Omega|} \|E[(\mathcal{V}_s - E[\mathcal{V}_s])^2]\|_{\text{op}}$ .

$$\begin{aligned} E[(\mathcal{V}_s)^2(X)] &= E \left[ \frac{1}{p(v_s, i_s, j_s)^2} \langle \mathcal{X}, P_T(\mathcal{E}^{(s)}) \rangle \|P_T(\mathcal{E}^{(s)})\|_F^2 P_T(\mathcal{E}^{(s)}) \right] \\ &\leq \frac{1}{c_0 \beta \log N} E \left[ \frac{1}{p(v_s, i_s, j_s)} \langle \mathcal{X}, P_T(\mathcal{E}^{(s)}) \rangle P_T(\mathcal{E}^{(s)}) \right] = \frac{1}{|\Omega| c_0 \beta \log N} P_T(\mathcal{X}). \end{aligned} \quad (28)$$

$$\|E[(\mathcal{V}_s - E[\mathcal{V}_s])^2]\|_{\text{op}} = \|E[\mathcal{V}_s^2] - (E[\mathcal{V}_s])^2\|_{\text{op}} \leq \max(\|E[\mathcal{V}_s^2]\|_{\text{op}}, \|(E[\mathcal{V}_s])^2\|_{\text{op}}) \stackrel{(a)}{\leq} \frac{1}{|\Omega| c_0 \beta \log N}, \quad (29)$$

where (a) follows as  $\|P_T\|_{\text{op}} \leq 1$ .

Thus,  $\sigma^2 := \sum_{s=1}^{|\Omega|} \|E[(\mathcal{V}_s - E[\mathcal{V}_s])^2]\|_{\text{op}} \leq \frac{1}{c_0 \beta \log N}$

(iii) The lemma follows by using (i) and (ii) above in the operator Bernstein inequality in (25).

## D Proof of Lemma 4

Recall that under the assumptions made in the paper  $\|\cdot\|_{\mathcal{A}}$  is norm, and by the sub differential characterization of norms we have the following:

$$\partial\|\mathcal{M}\|_{\mathcal{A}} = \{\mathcal{E} + \mathcal{W} : \mathcal{E} \in \mathcal{E}(\mathcal{M}) \cap T, \mathcal{W} \in T^\perp, \|\mathcal{W}\|_{\mathcal{A}}^* \leq 1\} \quad (30)$$

Recall  $\mathcal{E}(\mathcal{M})$  from (4). In particular the set  $\{\mathcal{E}_{\mathcal{M}} + \mathcal{W} : \mathcal{W} \in T^\perp, \|\mathcal{W}\|_{\mathcal{A}}^* \leq 1\} \subset \partial\|\mathcal{M}\|_{\mathcal{A}}$ , where  $\mathcal{E}_{\mathcal{M}}$  is the sign vector from Assumption 2.

Given any  $\Delta$ , with  $P_\Omega(\Delta) = 0$ , consider any  $\mathcal{W} \in T^\perp$ , such that  $\|P_{T^\perp}(\Delta)\|_{\mathcal{A}} = \langle \mathcal{W}, P_{T^\perp}(\Delta) \rangle$  and  $\mathcal{E}_{\mathcal{M}} + \mathcal{W} \in \partial\|\mathcal{M}\|_{\mathcal{A}}$ . Let  $\mathcal{Y} = P_\Omega(\mathcal{Y})$  be a dual certificate satisfying the conditions stated in the Lemma.

$$\begin{aligned} \|\mathcal{M} + \Delta\|_{\mathcal{A}} &\stackrel{(a)}{\geq} \|\mathcal{M}\|_{\mathcal{A}} + \langle \mathcal{E}_{\mathcal{M}} + \mathcal{W} - \mathcal{Y}, \Delta \rangle = \|\mathcal{M}\|_{\mathcal{A}} + \langle \mathcal{E}_{\mathcal{M}} - P_T(\mathcal{Y}), P_T(\Delta) \rangle + \langle \mathcal{W} - P_{T^\perp}(\mathcal{Y}), P_{T^\perp}(\Delta) \rangle \\ &\stackrel{(b)}{\geq} \|\mathcal{M}\|_{\mathcal{A}} - \|\mathcal{E}_{\mathcal{M}} - P_T(\mathcal{Y})\|_F \|P_T(\Delta)\|_F + \|P_{T^\perp}(\Delta)\|_{\mathcal{A}} (1 - \|P_{T^\perp}(\mathcal{Y})\|_{\mathcal{A}}^*) \\ &\stackrel{(c)}{\geq} \|\mathcal{M}\|_{\mathcal{A}} - \frac{1}{2} \kappa_\Omega(N) \|\mathcal{E}_{\mathcal{M}} - P_T(\mathcal{Y})\|_F \|P_{T^\perp}(\Delta)\|_F + \frac{1}{2} \|P_{T^\perp}(\Delta)\|_{\mathcal{A}} \stackrel{(d)}{>} \|\mathcal{M}\|_{\mathcal{A}}, \end{aligned} \quad (31)$$

where (a) follows as  $\langle \Delta, \mathcal{Y} \rangle = 0$ , (b) follows from Holder's inequality, (c) follows as  $\|P_{T^\perp}(\mathcal{Y})\|_{\mathcal{A}}^* \leq \frac{1}{2}$  and  $\frac{1}{2} \kappa_\Omega(N) \|P_{T^\perp}(\Delta)\|_F \geq \|P_T(\Delta)\|_F$  w.h.p. (from (22)), and (d) follows as  $\|\mathcal{E}_{\mathcal{M}} - P_T(\mathcal{Y})\|_F < \frac{1}{\kappa_\Omega(N)}$  and using  $\|\mathcal{X}\|_{\mathcal{A}} = \min_{Z \succ 0} \text{tr}(Z)$  s.t.  $P_v[Z] = X_v \forall v \geq \min_{Z \succ 0} \|Z\|_F$  s.t.  $P_v[Z] = X_v \forall v \geq \|\mathcal{X}\|_F$ .

## E Dual Certificate–Bound on $\|P_{T^\perp} \mathcal{Y}_p\|_{\mathcal{A}}^*$

Recall that  $\mathcal{Y}_p$  was constructed through a iterative process described in Sec. 5.2 following a golfing scheme introduced by Gross et al. [1]. The proof for the second property of the dual certificate, extends directly from the analogous proof for matrix completion by Recht [2]. We note that:

$$\|P_{T^\perp} \mathcal{Y}_p\|_{\mathcal{A}}^* \leq \sum_{j=1}^p \|P_{T^\perp} \mathcal{R}_{\Omega^{(j)}} \mathcal{W}_{j-1}\|_{\mathcal{A}}^* = \sum_{j=1}^p \|P_{T^\perp} (\mathcal{R}_{\Omega^{(j)}} - \mathcal{I}) \mathcal{W}_{j-1}\|_{\mathcal{A}}^* \leq \sum_{j=1}^p \|(\mathcal{R}_{\Omega^{(j)}} - \mathcal{I}) \mathcal{W}_{j-1}\|_{\mathcal{A}}^* \quad (32)$$

Denote  $\max_{(v,i,j)} |\langle \mathcal{X}, \mathcal{E}^{(v,i,j)} \rangle| = \|\mathcal{X}\|_{\max}$ .

We state the following lemmas which are directly adapted from Theorem 3.5 and Lemma 3.6 in [2]:

**Lemma 5.** *Let  $\Omega$  be any subset of entries of size  $|\Omega|$  sampled independently according to Assumption 4, such that  $E[\mathcal{R}_s(\mathcal{W})] = \frac{1}{|\Omega|} \mathcal{W}$ , then for all  $\beta > 1$  and  $N \geq 2$ , the following holds with probability greater than  $1 - N^{1-\beta}$  provided  $|\Omega| > 6N\beta \log N$ , and  $\frac{|\Omega_k|}{n_k m_k} \geq \frac{|\Omega|}{N^2}$ ;  $\forall k$ :*

$$\|(\mathcal{R}_\Omega - \mathcal{I}) \mathcal{W}\|_{\mathcal{A}}^* \leq \|\mathcal{B}(\mathcal{R}_\Omega \mathcal{W} - \mathcal{W})\|_2 \leq \sqrt{\frac{8\beta N^3 \log N}{3|\Omega|}} \|\mathcal{W}\|_{\max} \quad (33)$$

*Proof.* The proof is obtained by applying the steps described for the analogous proof in [2] on  $\|\mathcal{B}(\mathcal{R}_\Omega \mathcal{W} - \mathcal{W})\|_2$ . For  $s = 1, 2, \dots, |\Omega|$ , let  $\mathcal{V}_s = \mathcal{B}(\mathcal{R}_s(\mathcal{W}))$ , then  $\mathcal{B}(\mathcal{R}_\Omega \mathcal{W} - \mathcal{W}) = \sum_{s=1}^{|\Omega|} (\mathcal{V}_s - E[\mathcal{V}_s])$  is a sum of independent zero mean random variables. From the proof of Theorem 3.5 in the work by Recht [3], we have that for any  $N \times N$  matrix  $Z$ ,  $\|Z\|_2 \leq N\|Z\|_{\max}$ .

(i)  $\|\mathcal{V}_s - E[\mathcal{V}_s]\|_2 \leq \|\mathcal{V}_s\|_2 + \|E[\mathcal{V}_s]\|_2 \stackrel{(a)}{\leq} \frac{N^2}{|\Omega|} \|\mathcal{W}\|_{\max} + \frac{N}{|\Omega|} \|\mathcal{W}\|_{\max} \leq \frac{3N^2}{2|\Omega|} \|\mathcal{W}\|_{\max}$  for  $N \geq 2$ , where (a) follows as  $\frac{1}{p(v,i,j)} \leq \frac{1}{\min_k \frac{|\Omega_k|}{n_k m_k}} \leq \frac{N^2}{|\Omega|}$  if  $\frac{|\Omega_k|}{n_k m_k} \geq \frac{|\Omega|}{N^2}$ ,  $\forall k$ ; and  $\|E[\mathcal{V}_s]\|_2 = \frac{1}{|\Omega|} \|\mathcal{B}(\mathcal{W})\|_2$ .

(ii)  $\|E[(\mathcal{V}_s - E[\mathcal{V}_s])^2]\|_2 = \|E[\mathcal{V}_s^2] - (E[\mathcal{V}_s])^2\|_2 \leq \max\{\|E[\mathcal{V}_s^2]\|_2, \|(E[\mathcal{V}_s])^2\|_2\}$ .

Now,  $\|(E[\mathcal{V}_s])^2\|_2 = \frac{1}{|\Omega|^2} \|\mathcal{B}(\mathcal{W}) * \mathcal{B}(\mathcal{W})\|_2 \leq \frac{N^2}{|\Omega|^2} \|\mathcal{W}\|_{\max}^2$ .

Also,  $\|E[\mathcal{V}_s^2]\|_2 = \frac{1}{|\Omega|} \left\| \sum_{v=1}^V \sum_{(i,j) \in \mathcal{I}(v)} \frac{1}{p(v,i,j)} \langle \mathcal{W}, \mathcal{E}^{(v,i,j)} \rangle \mathcal{B}(\mathcal{E}^{(v,i,j)}) \right\|_2 \leq \frac{N^4}{|\Omega|^2} \|\mathcal{W}\|_{\max}^2$ .

Thus  $\sigma^2 := \|E[(\mathcal{V}_s - E[\mathcal{V}_s])^2]\|_2 \leq \frac{N^4}{|\Omega|^2} \|\mathcal{W}\|_{\max}^2$

The proof follows by using the above bounds in operator Bernstein's inequality with  $t = \sqrt{\frac{8\beta N^3 \log N}{3|\Omega|}} \|\mathcal{W}\|_{\max}$

**Lemma 6.** *If  $\forall k$ ,  $|\Omega_k| \geq c_0 \beta n_k R \log N$ , and the Assumptions in 3.1 are satisfied, then for sufficiently large  $c_0$ , the following holds with probability greater than  $1 - N^{1-\beta}$ :*

$$\forall \mathcal{W} \in T \quad \|P_T \mathcal{R}_\Omega \mathcal{W} - \mathcal{W}\|_{\max} \leq \frac{1}{2} \|\mathcal{W}\|_{\max} \quad (34)$$

Using the above lemmas in (32), we have:

$$\begin{aligned} \|P_{T^\perp} \mathcal{Y}_p\|_{\mathcal{A}}^* &\leq \sum_{j=1}^p \|(\mathcal{R}_{\Omega^{(j)}} - \mathcal{I}) \mathcal{W}_{j-1}\|_{\mathcal{A}}^* \stackrel{(a)}{\leq} \sum_{j=1}^p \sqrt{\frac{8\beta N^3 \log N}{3|\Omega^{(j)}|}} \|\mathcal{W}_{j-1}\|_{\max} \\ &\stackrel{(b)}{\leq} 2 \sum_{j=1}^p 2^{-j} \sqrt{\frac{8\beta N^3 \log N}{3|\Omega^{(j)}|}} \|\mathcal{E}_{\mathcal{M}}\|_{\max} \stackrel{(c)}{\leq} 2 \sum_{j=1}^p 2^{-j} \sqrt{\frac{8\beta \mu_1 R N \log N}{3|\Omega^{(j)}|}} \stackrel{(d)}{\leq} \frac{1}{2}, \end{aligned} \quad (35)$$

where (a) follows from Lemma 5, (b) from Lemma 6 as  $\mathcal{W}_j = \mathcal{W}_{j-1} - P_T \mathcal{R}_\Omega \mathcal{W}_{j-1}$ , (c) from the second incoherence condition in Assumption 2, and finally (d) if for large enough  $c_1$ ,  $|\Omega^{(j)}| > c_1 \mu_1 \beta R N \log N$ .

Finally, the probability that the proposed dual certificate  $\mathcal{Y}_p$  fails the conditions of Lemma 4 is given by a union bound of the failure probabilities of (24), Lemma 5, and 6 for any partition  $\Omega^{(j)}$ :  $3c_1 \log(N \kappa_\Omega(N)) N^{1-\beta}$ ; thus proving Theorem 1.

### E.1 Proof of Lemma 6

Using union bound and noting that  $\sum_v n_{r_v} n_{c_v} \leq N^2$ , we have:

$$Pr(\|P_T \mathcal{R}_\Omega \mathcal{W} - \mathcal{W}\|_{\max} > \frac{1}{2} \|\mathcal{W}\|_{\max}) \leq Pr(\langle P_T \mathcal{R}_\Omega \mathcal{W} - \mathcal{W}, \mathcal{E}^{(v,i,j)} \rangle > \frac{1}{2} \|\mathcal{W}\|_{\max} \text{ for any } (v,i,j)) N^2$$

For each  $(v, i, j)$ , sample  $s' = (v_{s'}, i_{s'}, j_{s'})$  according to the sampling distribution in Assumption 4. Define  $\Psi_{(v,i,j)} = \langle \mathcal{E}^{(v,i,j)}, P_T \mathcal{R}_{s'} \mathcal{W} - \frac{1}{|\Omega|} \mathcal{W} \rangle$ . Recall the definition of  $\mathcal{R}_s$  from the paper. Now each entry of  $P_T \mathcal{R}_\Omega \mathcal{W} - \mathcal{W}$  is distributed as  $\sum_{s=1}^{|\Omega|} \Psi_{(v,i,j)}^{(s)}$ , where  $\Psi_{(v,i,j)}^{(s)}$  are iid samples of  $\Psi_{(v,i,j)}$ .

We have that :  $|\Psi_{(v,i,j)}| \leq \frac{1}{p(v,i,j)} \|P_T(\mathcal{E}^{(v,i,j)})\|_F^2 |\langle \mathcal{E}^{(v,i,j)}, \mathcal{W} \rangle| \leq \frac{1}{c' \beta \log N} \|\mathcal{W}\|_{\max}$

Also,  $E[\Psi_{(v,i,j)}^2] = E[\frac{1}{p(v,i,j)^2} \langle \mathcal{E}^{(v,i,j)}, \mathcal{W} \rangle^2 \langle \mathcal{E}^{(v,i,j)}, \mathcal{E}^{(s')} \rangle^2] \leq \frac{1}{|\Omega| c' \beta \log N}$ , where the expectation is over  $s'$ . Standard Bernstein inequality can be used with the above bounds to prove the lemma.

### References

- [1] D Gross. Recovering low-rank matrices from few coefficients in any basis. *Information Theory, IEEE Transactions on*, 2011.
- [2] B. Recht. A simpler approach to matrix completion. *JMLR*, 2011.
- [3] B. Recht, M. Fazel, and P. A. Parrilo. Guaranteed minimum-rank solutions of linear matrix equations via nuclear norm minimization. *SIAM review*, 2010.
- [4] Joel A Tropp. User-friendly tail bounds for sums of random matrices. *Foundations of Computational Mathematics*, 12(4):389–434, 2012.
